# Supplementary material for: Subdivision of Urban Traffic Area Based on the Combination of Static Zoning and Dynamic Zoning
Source: Hindawi journal article supplement (doi:10.1155/2021/9954267), 2021-07-15
Supplement: f1 [file 9954267.f1.docx]

Supplementary Materials：

Appendix 1: length structure table of each road section in the traffic network sub-area.

Appendix 2: traffic flow table for each section of the traffic network sub-area

Appendix 1: length of each road section and number of two-way lanes ((Unit: *km*)

| Road section | Number of two-way lanes | Length of road section | Road section | Number of two-way lanes | Length of road section | Road section | Number of two-way lanes | Length of road section |
| --- | --- | --- | --- | --- | --- | --- | --- | --- |
| *a*1~*a*2 | 2 | 0.508 | *a*13- *a*14 | 6 | 0.458 | *a*24- *a*26 | 4 | 0.211 |
| *a*1~ *a*6 | 4 | 0.177 | *a*13- *a*22 | 4 | 0.472 | *a*25- *a*27 | 2 | 0.209 |
| *a*2- *a*3 | 2 | 0.464 | *a*14- *a*15 | 6 | 0.464 | *a*26- *a*27 | 2 | 0.421 |
| *a*2- *a*7 | 2 | 0.220 | *a*14- *a*18 | 2 | 0.235 | *a*26- *a*31 | 4 | 0.247 |
| *a*3- *a*4 | 2 | 0.421 | *a*15- *a*16 | 6 | 0.414 | *a*27- *a*28 | 2 | 0.419 |
| *a*3- *a*8 | 2 | 0.223 | *a*15- *a*19 | 4 | 0.226 | *a*27- *a*32 | 2 | 0.307 |
| *a*4- *a*5 | 2 | 0.412 | *a*16- *a*17 | 6 | 0.419 | *a*28- *a*33 | 4 | 0.362 |
| *a*4- *a*9 | 4 | 0.216 | *a*16- *a*20 | 2 | 0.246 | *a*29- *a*30 | 6 | 0.492 |
| *a*5- *a*10 | 2 | 0.224 | *a*17- *a*21 | 4 | 0.228 | *a*29- *a*35 | 4 | 0.764 |
| *a*6- *a*13 | 4 | 0.473 | *a*18- *a*19 | 2 | 0.461 | *a*30- *a*31 | 6 | 0.477 |
| *a*6- *a*7 | 2 | 0.501 | *a*18- *a*23 | 2 | 0.236 | *a*30- *a*36 | 2 | 0.756 |
| *a*7- *a*14 | 2 | 0.468 | *a*19- *a*20 | 2 | 0.422 | *a*31- *a*32 | 6 | 0.405 |
| *a*7- *a*8 | 2 | 0.464 | *a*19- *a*24 | 4 | 0.256 | *a*31- *a*38 | 4 | 0.736 |
| *a*8~ *a*15 | 2 | 0.460 | *a*20- *a*21 | 2 | 0.411 | *a*32- *a*33 | 6 | 0.429 |
| *a*8- *a*~~9~~ | 2 | 0.418 | *a*20- *a*25 | 2 | 0.245 | *a*33- *a*34 | 6 | 0.111 |
| *a*9- *a*10 | 2 | 0.414 | *a*21- *a*28 | 4 | 0.462 | *a*34- *a*40 | 6 | 0.560 |
| *a*9- *a*11 | 4 | 0.226 | *a*22- *a*23 | 2 | 0.463 | *a*35- *a*36 | 4 | 0.499 |
| *a*10- *a*12 | 2 | 0.233 | *a*22- *a*29 | 4 | 0.337 | *a*36- *a*37 | 4 | 0.424 |
| *a*11~ *a*16 | 4 | 0.213 | *a*23- *a*24 | 2 | 0.456 | *a*37- *a*38 | 4 | 0.112 |
| *a*11- *a*12 | 2 | 0.418 | *a*23- *a*30 | 2 | 0.402 | *a*38- *a*39 | 4 | 0.447 |
| *a*12- *a*17 | 2 | 0.250 | *a*24- *a*25 | 2 | 0.418 | *a*40- *a*39 | 6 | 0.440 |

Appendix 2: traffic flow at intersections in 12 time periods (Unit: *veh / h*)

| Intersection | Time period | Traffic flow | Intersection | Time period | Traffic flow | Intersection | Time period | Traffic flow | Intersection | Time period | Traffic flow |
| --- | --- | --- | --- | --- | --- | --- | --- | --- | --- | --- | --- |
| *a*1 | 1 | 552 | *a*2 | 1 | 672 | *a*3 | 1 | 858 | *a*4 | 1 | 1050 |
| 2 | 546 | 2 | 708 | 2 | 828 | 2 | 1158 |
| 3 | 552 | 3 | 702 | 3 | 852 | 3 | 1092 |
| 4 | 618 | 4 | 750 | 4 | 858 | 4 | 1074 |
| 5 | 624 | 5 | 810 | 5 | 792 | 5 | 1116 |
| 6 | 618 | 6 | 780 | 6 | 870 | 6 | 1152 |
| 7 | 648 | 7 | 720 | 7 | 852 | 7 | 1098 |
| 8 | 606 | 8 | 732 | 8 | 870 | 8 | 1146 |
| 9 | 576 | 9 | 744 | 9 | 804 | 9 | 1062 |
| 10 | 666 | 10 | 690 | 10 | 870 | 10 | 1044 |
| 11 | 636 | 11 | 708 | 11 | 816 | 11 | 1122 |
| 12 | 594 | 12 | 702 | 12 | 810 | 12 | 1026 |
| *a*5 | 1 | 690 | *a*6 | 1 | 906 | *a*7 | 1 | 1248 | *a*8 | 1 | 1254 |
| 2 | 732 | 2 | 1044 | 2 | 1350 | 2 | 1266 |
| 3 | 702 | 3 | 924 | 3 | 1188 | 3 | 1236 |
| 4 | 786 | 4 | 876 | 4 | 1110 | 4 | 1230 |
| 5 | 744 | 5 | 906 | 5 | 1206 | 5 | 1302 |
| 6 | 732 | 6 | 906 | 6 | 1134 | 6 | 1248 |
| 7 | 726 | 7 | 846 | 7 | 1170 | 7 | 1236 |
| 8 | 774 | 8 | 906 | 8 | 1164 | 8 | 1116 |
| 9 | 672 | 9 | 906 | 9 | 1254 | 9 | 1146 |
| 10 | 660 | 10 | 858 | 10 | 1080 | 10 | 1086 |
| 11 | 648 | 11 | 846 | 11 | 1062 | 11 | 1218 |
| 12 | 696 | 12 | 804 | 12 | 1110 | 12 | 1134 |
| Intersection | Time period | Traffic flow | Intersection | Time period | Traffic flow | Intersection | Time period | Traffic flow | Intersection | Time period | Traffic flow |
| *a*9 | 1 | 1314 | *a*10 | 1 | 864 | *a*11 | 1 | 918 | *a*12 | 1 | 762 |
| 2 | 1254 | 2 | 810 | 2 | 870 | 2 | 756 |
| 3 | 1314 | 3 | 864 | 3 | 918 | 3 | 720 |
| 4 | 1188 | 4 | 816 | 4 | 882 | 4 | 822 |
| 5 | 1302 | 5 | 894 | 5 | 834 | 5 | 786 |
| 6 | 1404 | 6 | 906 | 6 | 966 | 6 | 708 |
| 7 | 1236 | 7 | 912 | 7 | 864 | 7 | 750 |
| 8 | 1230 | 8 | 918 | 8 | 912 | 8 | 822 |
| 9 | 1146 | 9 | 882 | 9 | 834 | 9 | 690 |
| 10 | 1266 | 10 | 810 | 10 | 816 | 10 | 726 |
| 11 | 1236 | 11 | 834 | 11 | 798 | 11 | 732 |
| 12 | 1224 | 12 | 822 | 12 | 702 | 12 | 762 |
| *a*13 | 1 | 4746 | *a*14 | 1 | 5004 | *a*a15 | 1 | 4074 | *a*16 | 1 | 3378 |
| 2 | 4548 | 2 | 5244 | 2 | 4116 | 2 | 3360 |
| 3 | 4542 | 3 | 4860 | 3 | 4098 | 3 | 3372 |
| 4 | 4632 | 4 | 5148 | 4 | 4080 | 4 | 3342 |
| 5 | 4260 | 5 | 4632 | 5 | 3708 | 5 | 3072 |
| 6 | 3954 | 6 | 4206 | 6 | 3684 | 6 | 2796 |
| 7 | 4092 | 7 | 4254 | 7 | 3522 | 7 | 2616 |
| 8 | 3972 | 8 | 3732 | 8 | 3420 | 8 | 2898 |
| 9 | 4044 | 9 | 4086 | 9 | 3570 | 9 | 2652 |
| 10 | 3834 | 10 | 3924 | 10 | 3282 | 10 | 2610 |
| 11 | 3720 | 11 | 3702 | 11 | 3558 | 11 | 2784 |
| 12 | 4086 | 12 | 4026 | 12 | 3378 | 12 | 2508 |

| Intersection | Time period | Traffic flow | Intersection | Time period | Traffic flow | Intersection | Time period | Traffic flow | Intersection | Time period | Traffic flow |
| --- | --- | --- | --- | --- | --- | --- | --- | --- | --- | --- | --- |
| *a*17 | 1 | 2958 | *a*18 | 1 | 810 | *a*19 | 1 | 1038 | *a*20 | 1 | 888 |
| 2 | 2952 | 2 | 696 | 2 | 972 | 2 | 882 |
| 3 | 3162 | 3 | 714 | 3 | 1014 | 3 | 936 |
| 4 | 3078 | 4 | 852 | 4 | 1104 | 4 | 804 |
| 5 | 2862 | 5 | 864 | 5 | 1080 | 5 | 870 |
| 6 | 2514 | 6 | 660 | 6 | 1062 | 6 | 840 |
| 7 | 2388 | 7 | 846 | 7 | 1182 | 7 | 864 |
| 8 | 2358 | 8 | 720 | 8 | 1188 | 8 | 762 |
| 9 | 2346 | 9 | 648 | 9 | 996 | 9 | 822 |
| 10 | 2322 | 10 | 804 | 10 | 1116 | 10 | 798 |
| 11 | 2496 | 11 | 630 | 11 | 1068 | 11 | 828 |
| 12 | 2172 | 12 | 648 | 12 | 1020 | 12 | 828 |
| *a*21 | 1 | 918 | *a*22 | 1 | 1050 | *a*23 | 1 | 954 | *a*24 | 1 | 1158 |
| 2 | 954 | 2 | 1134 | 2 | 876 | 2 | 1104 |
| 3 | 948 | 3 | 1116 | 3 | 918 | 3 | 1122 |
| 4 | 900 | 4 | 1140 | 4 | 972 | 4 | 1116 |
| 5 | 876 | 5 | 1056 | 5 | 960 | 5 | 1272 |
| 6 | 1026 | 6 | 1128 | 6 | 888 | 6 | 1224 |
| 7 | 894 | 7 | 1134 | 7 | 918 | 7 | 1212 |
| 8 | 1008 | 8 | 1020 | 8 | 810 | 8 | 1122 |
| 9 | 888 | 9 | 1056 | 9 | 858 | 9 | 1182 |
| 10 | 942 | 10 | 1074 | 10 | 876 | 10 | 1218 |
| 11 | 966 | 11 | 966 | 11 | 882 | 11 | 1218 |
| 12 | 858 | 12 | 1056 | 12 | 846 | 12 | 1182 |

| Intersection | Time period | Traffic flow | Intersection | Time period | Traffic flow | Intersection | Time period | Traffic flow | Intersection | Time period | Traffic flow |
| --- | --- | --- | --- | --- | --- | --- | --- | --- | --- | --- | --- |
| *a*25 | 1 | 630 | *a*26 | 1 | 1068 | *a*27 | 1 | 816 | *a*28 | 1 | 630 |
| 2 | 606 | 2 | 984 | 2 | 828 | 2 | 618 |
| 3 | 612 | 3 | 1092 | 3 | 894 | 3 | 696 |
| 4 | 594 | 4 | 1062 | 4 | 798 | 4 | 600 |
| 5 | 654 | 5 | 1080 | 5 | 846 | 5 | 678 |
| 6 | 606 | 6 | 1068 | 6 | 834 | 6 | 636 |
| 7 | 582 | 7 | 1158 | 7 | 804 | 7 | 690 |
| 8 | 588 | 8 | 1182 | 8 | 792 | 8 | 612 |
| 9 | 588 | 9 | 1176 | 9 | 792 | 9 | 660 |
| 10 | 702 | 10 | 1200 | 10 | 756 | 10 | 570 |
| 11 | 630 | 11 | 1170 | 11 | 780 | 11 | 582 |
| 12 | 558 | 12 | 1182 | 12 | 732 | 12 | 552 |
| *a*29 | 1 | 2424 | *a*30 | 1 | 1926 | *a*31 | 1 | 2646 | *a*32 | 1 | 1914 |
| 2 | 2640 | 2 | 2076 | 2 | 2862 | 2 | 2064 |
| 3 | 2568 | 3 | 2220 | 3 | 2916 | 3 | 2016 |
| 4 | 2676 | 4 | 2226 | 4 | 2898 | 4 | 2148 |
| 5 | 2772 | 5 | 2190 | 5 | 3030 | 5 | 2100 |
| 6 | 2862 | 6 | 2322 | 6 | 3312 | 6 | 2592 |
| 7 | 2868 | 7 | 2430 | 7 | 3054 | 7 | 2340 |
| 8 | 2880 | 8 | 2376 | 8 | 3372 | 8 | 2304 |
| 9 | 2568 | 9 | 2124 | 9 | 3288 | 9 | 2142 |
| 10 | 3030 | 10 | 2466 | 10 | 3498 | 10 | 2226 |
| 11 | 2928 | 11 | 2640 | 11 | 3822 | 11 | 2736 |
| 12 | 3036 | 12 | 2610 | 12 | 3744 | 12 | 2448 |

| Intersection | Time period | Traffic flow | Intersection | Time period | Traffic flow | Intersection | Time period | Traffic flow | Intersection | Time period | Traffic flow |
| --- | --- | --- | --- | --- | --- | --- | --- | --- | --- | --- | --- |
| *a*33 | 1 | 1962 | *a*34 | 1 | 2946 | *a*35 | 1 | 1776 | *a*36 | 1 | 1158 |
| 2 | 2142 | 2 | 3288 | 2 | 1806 | 2 | 1218 |
| 3 | 2244 | 3 | 3306 | 3 | 1884 | 3 | 1224 |
| 4 | 2226 | 4 | 3438 | 4 | 2010 | 4 | 1290 |
| 5 | 1938 | 5 | 3120 | 5 | 2052 | 5 | 1410 |
| 6 | 2430 | 6 | 3588 | 6 | 2142 | 6 | 1446 |
| 7 | 2304 | 7 | 3582 | 7 | 2112 | 7 | 1368 |
| 8 | 2274 | 8 | 3570 | 8 | 2250 | 8 | 1422 |
| 9 | 2202 | 9 | 3480 | 9 | 2184 | 9 | 1506 |
| 10 | 2256 | 10 | 3528 | 10 | 2124 | 10 | 1434 |
| 11 | 2556 | 11 | 4002 | 11 | 2166 | 11 | 1470 |
| 12 | 2538 | 12 | 4116 | 12 | 2328 | 12 | 1566 |
| *a*37 | 1 | 1182 | *a*38 | 1 | 1644 | *a*39 | 1 | 1554 | *a*40 | 1 | 1296 |
| 2 | 1302 | 2 | 1668 | 2 | 1734 | 2 | 1350 |
| 3 | 1272 | 3 | 1758 | 3 | 1656 | 3 | 1392 |
| 4 | 1386 | 4 | 1908 | 4 | 1800 | 4 | 1302 |
| 5 | 1374 | 5 | 1746 | 5 | 1668 | 5 | 1332 |
| 6 | 1338 | 6 | 1764 | 6 | 1914 | 6 | 1614 |
| 7 | 1428 | 7 | 1878 | 7 | 1764 | 7 | 1458 |
| 8 | 1392 | 8 | 2040 | 8 | 1830 | 8 | 1458 |
| 9 | 1422 | 9 | 1956 | 9 | 1920 | 9 | 1674 |
| 10 | 1512 | 10 | 2532 | 10 | 2280 | 10 | 1734 |
| 11 | 1668 | 11 | 2670 | 11 | 2238 | 11 | 1752 |
| 12 | 1818 | 12 | 2694 | 12 | 2430 | 12 | 1722 |
